# Supplementary material
Source: PubMed Central journal article supplement (PMC5635654)

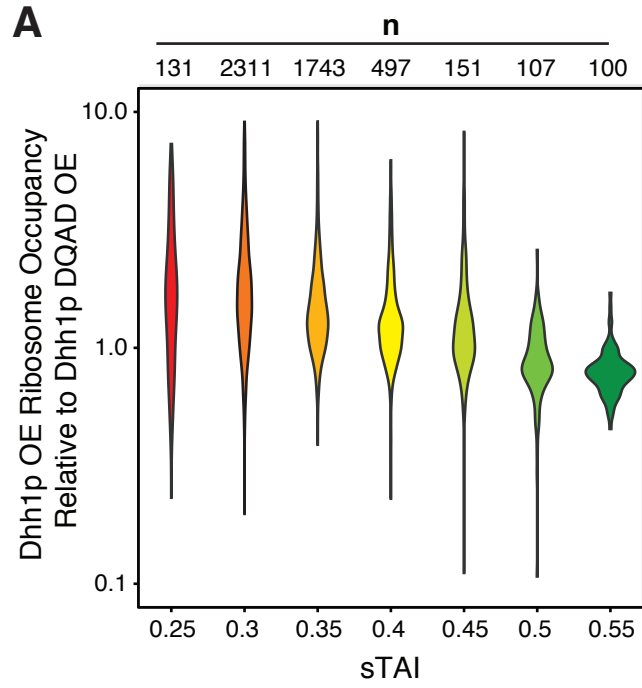

**B**

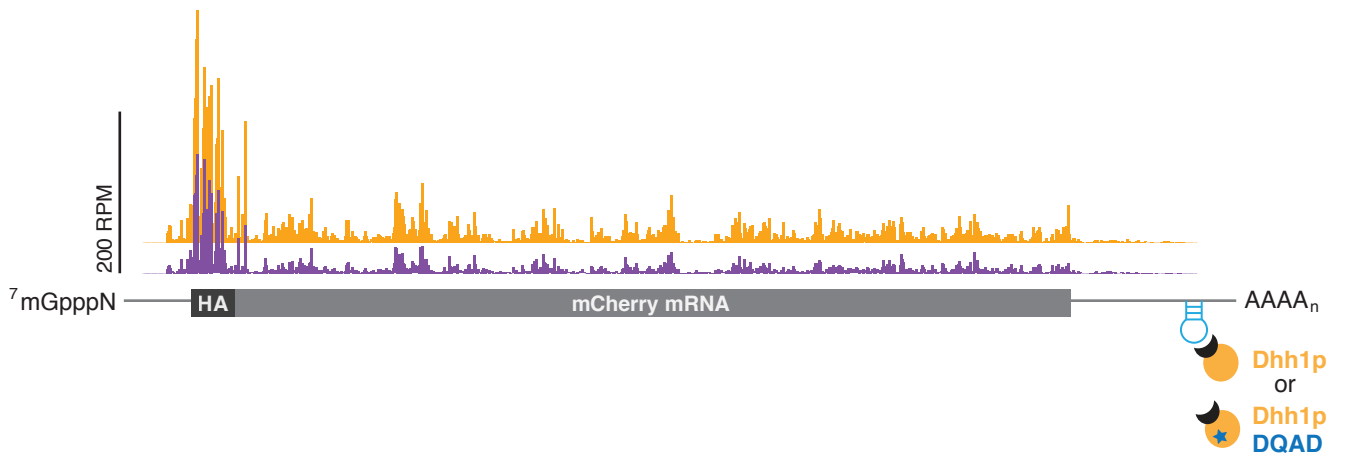

Supplement: NIHMS813130-supplement-4.pdf [file NIHMS813130-supplement-4.pdf]
